# Supplementary material for: Analysis of the Level of Adiponectin and Selected Cytokines in Patients with Knee Osteoarthritis
Source: Preprints.org preprint supplement (doi:10.20944/preprints202403.0164.v1), 2024-03-05
Supplement: Supplementary file 1 [file supplementary]

## Sheet: Sheet1
MALES																FEMALES
Correlation p values																	Correlation p values
	Gender	Age	BMI	Kellgren-Lawrebce score	WOMAC pain subscale	WOMAC stiffness subscale	WOMAC physical function	Total WOMAC score	VAS score	IL10	IL6	Adiponectin	TNFa					Gender	Age	BMI	Kellgren-Lawrebce score	WOMAC pain subscale	WOMAC stiffness subscale	WOMAC physical function	Total WOMAC score	VAS score	IL10	IL6	Adiponectin	TNFa
Gender																	Gender
Age			0.417659	0.0956349	0.0438757	0.00793651	0.0108598	0.0146032	0.132963	0.182024	0.208029	0.0643386	0.506534				Age			0.0787477	0.0506666	0.0416816	0.0203408	0.0230215	0.0277301	0.12856	0.46294	0.371896	0.285644	0.654403
BMI		0.417659		0.578968	0.313483	0.185714	0.494484	0.762813	0.544921	0.0239683	0.0233592	0.17862	1				BMI		0.0787477		0.498445	0.546305	0.612947	0.387741	0.454009	0.428488	0.700731	0.828255	0.563747	0.260218
Kellgren-Lawrebce score		0.0956349	0.578968		0.031746	0.0289683	0.00515873	0.0289683	0.000793651	0.710119	0.884921	0.25754	0.459921				Kellgren-Lawrebce score		0.0506666	0.498445		0.00113071	0.00660054	0.000199503	0.000310999	0.000657081	0.928012	0.374384	0.525066	0.540962
WOMAC pain subscale		0.0438757	0.313483	0.031746		0.00939153	0.00566799	0.00297399	0.00150794	0.111651	0.191585	0.0922795	0.461332				WOMAC pain subscale		0.0416816	0.546305	0.00113071		6.14465e-05	2.3125e-07	6.82739e-08	0.000411031	0.206056	0.761216	0.802574	0.692109
WOMAC stiffness subscale		0.00793651	0.185714	0.0289683	0.00939153		0.000132275	0.00343915	0.0337302	0.0613757	0.192857	0.239153	0.732011				WOMAC stiffness subscale		0.0203408	0.612947	0.00660054	6.14465e-05		4.75715e-05	2.97322e-05	0.00487211	0.750833	0.748022	0.766809	0.693574
WOMAC physical function		0.0108598	0.494484	0.00515873	0.00566799	0.000132275		0.00013448	0.00555556	0.259942	0.50558	0.323115	1				WOMAC physical function		0.0230215	0.387741	0.000199503	2.3125e-07	4.75715e-05		3.67064e-10	4.03961e-05	0.461537	0.954433	0.64961	0.463529
Total WOMAC score		0.0146032	0.762813	0.0289683	0.00297399	0.00343915	0.00013448		0.00776455	0.266316	0.387011	0.270176	0.561896				Total WOMAC score		0.0277301	0.454009	0.000310999	6.82739e-08	2.97322e-05	3.67064e-10		3.99865e-05	0.399659	0.930368	0.585126	0.466441
VAS score		0.132963	0.544921	0.000793651	0.00150794	0.0337302	0.00555556	0.00776455		0.488254	0.720185	0.116614	0.761561				VAS score		0.12856	0.428488	0.000657081	0.000411031	0.00487211	4.03961e-05	3.99865e-05		0.565117	0.886557	0.229425	0.383972
IL10		0.182024	0.0239683	0.710119	0.111651	0.0613757	0.259942	0.266316	0.488254		0.000876323	0.13515	0.110105				IL10		0.46294	0.700731	0.928012	0.206056	0.750833	0.461537	0.399659	0.565117		0.000573205	0.691938	0.818699
IL6		0.208029	0.0233592	0.884921	0.191585	0.192857	0.50558	0.387011	0.720185	0.000876323		0.0734265	0.144027				IL6		0.371896	0.828255	0.374384	0.761216	0.748022	0.954433	0.930368	0.886557	0.000573205		0.594406	0.498334
Adiponectin		0.0643386	0.17862	0.25754	0.0922795	0.239153	0.323115	0.270176	0.116614	0.13515	0.0734265		0.707164				Adiponectin		0.285644	0.563747	0.525066	0.802574	0.766809	0.64961	0.585126	0.229425	0.691938	0.594406		0.94248
TNFa		0.506534	1	0.459921	0.461332	0.732011	1	0.561896	0.761561	0.110105	0.144027	0.707164					TNFa		0.654403	0.260218	0.540962	0.692109	0.693574	0.463529	0.466441	0.383972	0.818699	0.498334	0.94248
